# Supplementary material
Source: publisher figshare collection journal article supplement (https://gsapubs.figshare.com/ndownloader/files/31132795)
Supplement: Supplementary file 1 [file 31132795]

## Sheet: Table-S6-Zircon Hf isotopes
Table S6. Zircon Hf isotopes of eclogites from Thongmön (Dingri County) and Riwu (Dinggye County), China.
Sample No.	Age (Ma)	±1σ	176Yb/177Hf	±2σ	176Lu/177Hf	±2σ	176Hf/177Hf	±2σ	εHf(t)	TDM (Ma)	TDM2 (Ma)	fLu/Hf
Thongmön (DR-18-24)
DR18-24-8	1851.3	13.5	0.0467	0.002	0.001535	7e-05	0.281683	6.7e-05	0.873423	2238.06	2460.61	-0.953765
DR18-24-28	1848.8	11.7	0.09273	0.00026	0.0032079	8.4e-06	0.281847	9.8e-05	4.55652	2101.76	2229.24	-0.903377
DR18-24-1	1845.2	15	0.04473	0.00063	0.001509	2e-05	0.281631	7e-05	-1.07332	2309.16	2576.65	-0.954548
DR18-24-2	1831.1	15.9	0.03273	0.00072	0.001092	2.1e-05	0.281712	5.8e-05	2.01134	2171.9	2374.46	-0.967108
DR18-24-6	1807.5	11.9	0.122	0.0014	0.004171	3.8e-05	0.281839	6.9e-05	2.24867	2171.79	2340.38	-0.874367
DR18-24-9	1728	28	0.0935	0.0028	0.003123	8.6e-05	0.28186	7.8e-05	2.63271	2077.74	2255.26	-0.905934
DR18-24-31†	13.88	0.45	0.00317	5.8e-05	0.0001081	1.5e-06	0.282314	6.5e-05	-15.894	1298.38	2115.85	-0.996744
DR18-24-4†	13.81	0.48	0.001483	5.7e-05	5.09e-05	1.6e-06	0.282248	6.4e-05	-18.2291	1386.71	2263.8	-0.998467
DR18-24-26†	13.68	0.47	0.001444	6e-05	5.05e-05	1.3e-06	0.282305	7.2e-05	-16.2161	1308.77	2136.17	-0.998193
Riwu (RW19-03)
RW19-03-2.2	1812.66	20.1045	0.05285	0.00076	0.00125	2e-05	0.281619	3.4e-05	-1.07185	2310.04	2580.36	-0.962349
RW19-03-6.2	1847.56	8.6005	0.03032	0.00042	0.000958	1.7e-05	0.281909	3.8e-05	9.59066	1891.88	1917.01	-0.971145
RW19-03-8.1	-	-	0.0504	0.0018	0.001047	4.1e-05	0.281637	3.9e-05	-0.179323	2272.92	2525.1	-0.968464
RW19-03-10.2	1843.37	5.94621	0.0479	0.0013	0.001201	3.1e-05	0.281625	3e-05	-0.797636	2298.75	2563.38	-0.963825
RW19-03-12.2	1852.99	6.63364	0.02889	0.00042	0.000749	1.1e-05	0.281495	3.7e-05	-4.84995	2449.39	2814.43	-0.97744
RW19-03-14.1	1731.7	43.3702	0.02867	0.00037	0.000928	1.3e-05	0.281667	3.1e-05	1.0345	2224.57	2449.82	-0.972048
RW19-03-209	1881.38	11.6366	0.02979	0.00071	0.000736	1.9e-05	0.281586	4.4e-05	-1.60226	2324.3	2613.43	-0.977831
RW19-03-214.1	1843.01	16.699	0.03205	0.00065	0.000655	3.6e-05	0.281621	7.2e-05	-0.258298	2271.65	2530.14	-0.980271
RW19-03-213.1	1848.51	6.37334	0.0413	0.0013	0.0008045	7.5e-06	0.281576	4.9e-05	-2.04285	2342.14	2640.69	-0.975768
RW19-03-213.2	1835.06	9.22407	0.0501	0.0013	0.0009915	6.5e-06	0.28152	5e-05	-4.26481	2430.57	2778.14	-0.970136
RW19-03-216.1	1814.26	12.9787	0.04946	0.00047	0.000955	1.2e-05	0.281547	5.1e-05	-3.26047	2391.19	2716.02	-0.971235
†indicate spots of metamorphic overgrowth zircon
